# Supplementary material for: Sb Nanoparticles Embedded in the N-Doped Carbon Fibers as Binder-Free Anode for Flexible Li-Ion Batteries
Source: MDPI journal article supplement (doi:10.3390/nano12183093), 2022-09-06
Supplement: s1 [file s1]

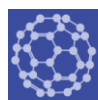

# Sb Nanoparticles Embedded in the N-Doped Carbon Fibers as Binder-Free Anode for Flexible Li-Ion Batteries

Xin Wang <sup>1</sup>, Nanjun Jia <sup>1</sup>, Jianwei Li <sup>1,\*</sup>, Pengbo Liu <sup>1</sup>, Xinsheng Zhao <sup>1</sup>, Yuxiao Lin <sup>1</sup>, Changqing Sun <sup>2</sup> and Wei Qin <sup>3,\*</sup>

<sup>1</sup> School of Physics and Electronic Engineering, Jiangsu Normal University, Xuzhou 221116, China

<sup>2</sup> Research Institute of Interdisciplinary Science and School of Materials Science and Engineering, Dongguan University of Technology, Dongguan 523820, China

<sup>3</sup> College of Materials Science and Engineering, Changsha University of Science and Technology, Changsha 410114, China

\* Correspondence: jwl189@163.com (J.L.); qinwei@csust.edu.cn (W.Q.)

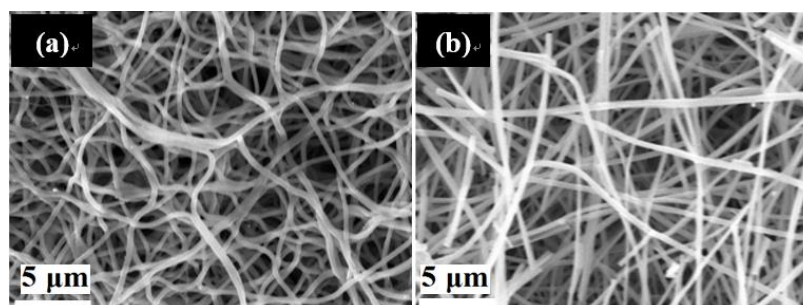

Figure S1. SEM images of (a) Sb1 and (b) Sb2.

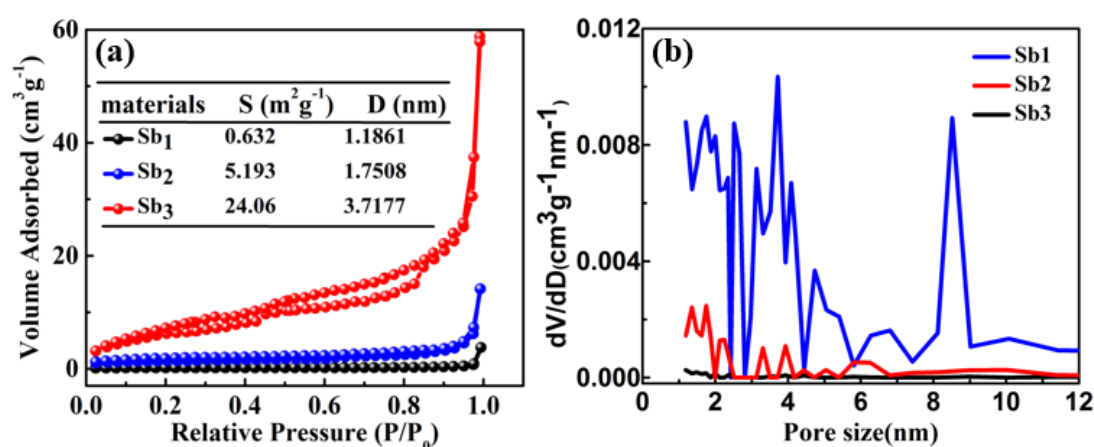

Figure S2. (a) N<sub>2</sub> adsorption-desorption isotherms and their as-calculated structural parameters in insert. (b) The pore size distribution of Sb1, Sb2, Sb3.

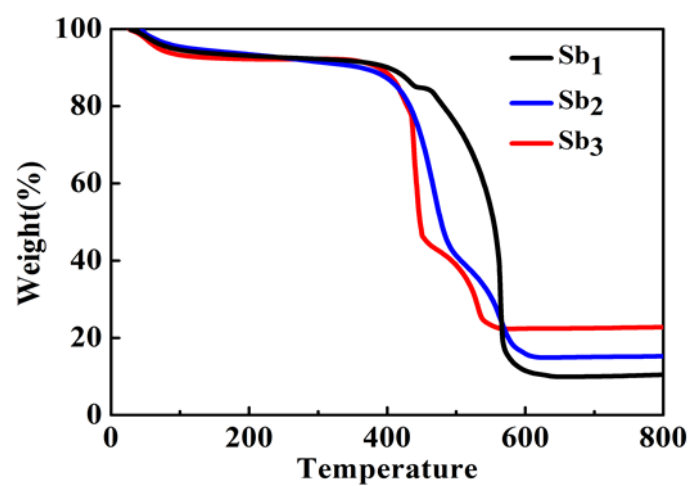

Figure S3. TGA curves of Sb<sub>1</sub>, Sb<sub>2</sub> and Sb<sub>3</sub>.
